# Supplementary material for: Building a Secure Biomedical Data Sharing Decentralized App (DApp): Tutorial
Source: PubMed Central journal article supplement (PMC6835476; doi:10.2196/13601), 2019-10-23
Supplement: jmir_v21i10e13601_app3.pdf [file jmir_v21i10e13601_app3.pdf]

| <b>Variable Name</b>   | <b>Description</b>                                                                                                                   |
|------------------------|--------------------------------------------------------------------------------------------------------------------------------------|
| creator                | The address of the creator of the contract                                                                                           |
| Category               | The predefined categories: None, Hospital, Gym, and Pharmacy                                                                         |
| numberOfParticipants   | A public variable representing the total number of Participants who have posted at least one location                                |
| addressToParticipantID | A private mapping of the Participants wallet address to a Participant ID                                                             |
| sharingEnabled         | A public mapping of Participant IDs to whether they have enabled sharing with Third Parties                                          |
| participantCoordinates | Mapping of Participant IDs to a mapping of the date/time of the hash of posted latitudes and longitudes                              |
| participantDateTimes   | Mapping of Participant IDs to an array of all of the date/times of their posted locations                                            |
| categoryLocation       | Mapping of the category type to an array of all the hashed geocoordinates of locations posted by Third Parties of that category type |
| locationToCategory     | Mapping of the hashed geocoordinates of locations posted by Third Parties to their respective category type                          |
