# Supplementary material for: Building a Secure Biomedical Data Sharing Decentralized App (DApp): Tutorial
Source: PubMed Central journal article supplement (PMC6835476; doi:10.2196/13601), 2019-10-23
Supplement: jmir_v21i10e13601_app4.pdf [file jmir_v21i10e13601_app4.pdf]

| <b>Function Name</b>              | <b>Description</b>                                                                                                                                                                                                                      |
|-----------------------------------|-----------------------------------------------------------------------------------------------------------------------------------------------------------------------------------------------------------------------------------------|
| postParticipantLocation           | Posts the timestamp and the hash of a Participant's formatted latitude and longitude. Creates a new Participant ID for the Participant address, if one doesn't exist. Assigns the sharing preference of the new Participant to be true. |
| postParticipantSharingPreference  | Toggles the sharing of the Participant's location data                                                                                                                                                                                  |
| getParticipantID                  | Returns the sender their Participant ID                                                                                                                                                                                                 |
| getParticipantSharingStatus       | Returns a flag to the sender indicating their current sharing status, if one exists                                                                                                                                                     |
| getParticipantNumberOfLocations   | Returns the sender with the total number of locations they have posted                                                                                                                                                                  |
| getParticipantDateTimeOfLocations | Returns the Participant with the timestamp, as Unix time, of a particular posted location, given an index                                                                                                                               |
| getParticipantCategory            | Provides the Participant with the category of a particular posted location, given the posted location's timestamp                                                                                                                       |
| postPOI                           | Assigns a category to a particular set of geocoordinates, given the category and geocoordinates.                                                                                                                                        |
| getSharingEnabled                 | Returns the sharing status of a particular Participant                                                                                                                                                                                  |
| getNumberOfLocations              | Returns the number of locations a particular Participant has visited, if that Participant has enabled sharing                                                                                                                           |
| getDateTimeOfLocations            | Returns the timestamp of a particular posted location for a particular Participant ID                                                                                                                                                   |
| getCategory                       | Returns the category of a particular posted location given a Participant ID and Unix time of the posted location.                                                                                                                       |
